# Supplementary material
Source: publisher figshare collection journal article supplement (https://future-science-group.figshare.com/ndownloader/files/28169466)
Supplement: Supplementary file 1 [file 28169466]

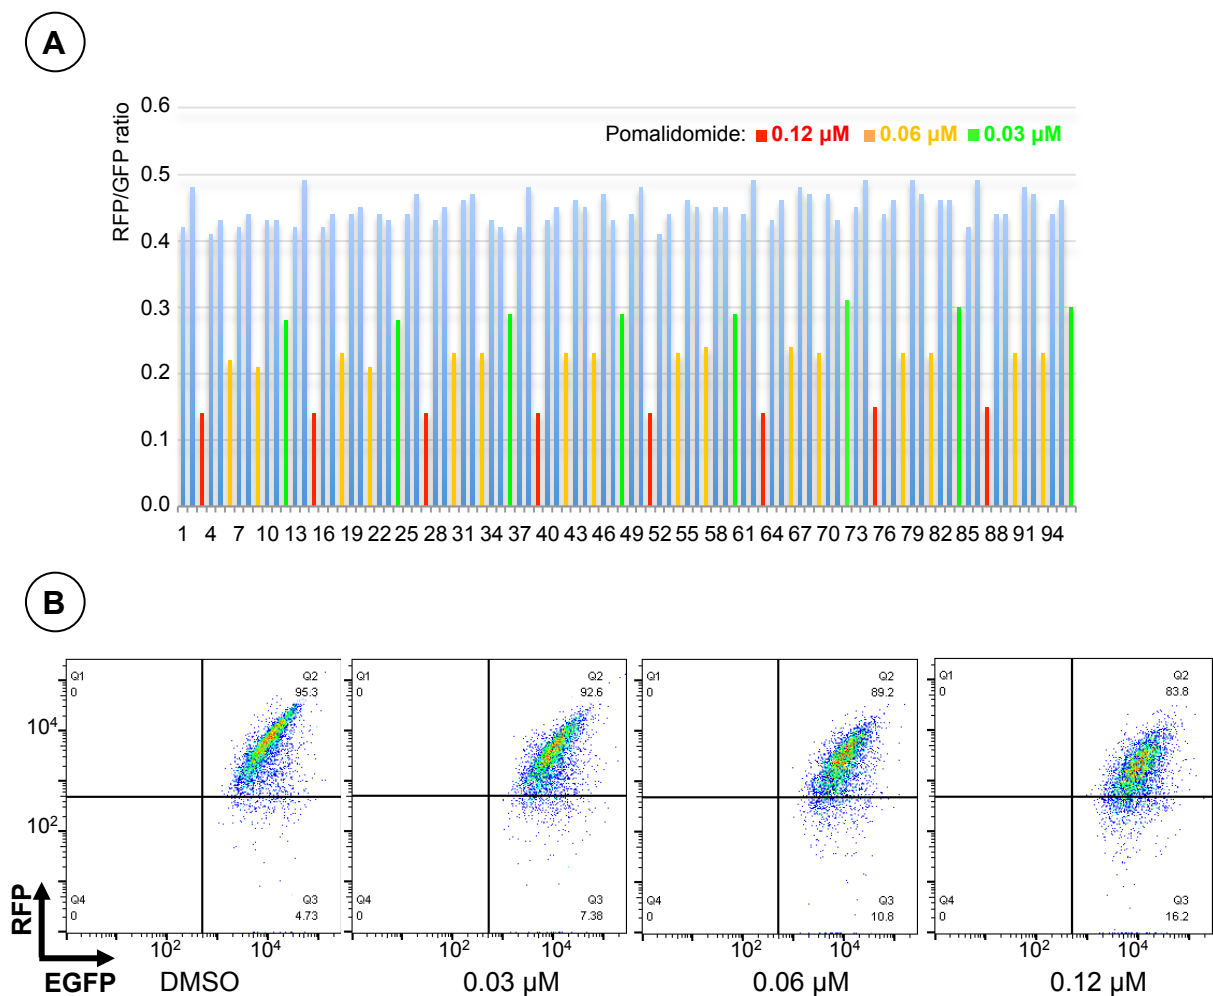

**Supplementary Figure 3: Effect of pomalidomide on IKZF3 stability.** SFFV-GP-IKZF3R cells were seeded in a 96 well plate. **A:** Pomalidomide was added 16 h before collecting cells at 0.03 (green), 0.06 (yellow) and 0.12 (red)  $\mu$ M. DMSO was added in the other wells. The mean of the ratios of RFP to EGFP fluorescence intensities are represented for each well. A clear and reproducible dose-dependent decrease in the amount of IKZF3-RFP was visible. **B:** examples of the FlowJo plots of RFP and EGFP fluorescences for control (well 11) and the three pomalidomide concentrations (wells 3, 9 and 12).
